# Supplementary material for: Single-Cell RNA-Sequencing Reveals Interactions between Endometrial Stromal Cells, Epithelial Cells, and Lymphocytes during Mouse Embryo Implantation
Source: MDPI journal article supplement (doi:10.3390/ijms24010213), 2022-12-22
Supplement: s1 [file s1]

**Table S1** The cell number of each cell type in four RNA-seq samples after passing quality control.

| Cell type        | IS 4.5dpc | IS 5.5dpc | I-IS 4.5 dpc | I-IS 5.5 dpc | Total |
|------------------|-----------|-----------|--------------|--------------|-------|
| Stromal cell     | 2193      | 3801      | 1702         | 1968         | 9664  |
| Epithelial cell  | 383       | 30        | 83           | 256          | 752   |
| Lymphocyte       | 644       | 1049      | 1394         | 499          | 3586  |
| Endothelial cell | 702       | 641       | 189          | 355          | 1887  |
| Myeloid          | 181       | 299       | 105          | 105          | 715   |
| Pericyte         | 522       | 43        | 54           | 54           | 898   |
| Myocyte          | 124       | 299       | 150          | 150          | 462   |
| Mesothelial cell | 35        | 67        | 68           | 68           | 185   |

**Table S2** List of protein markers on different immune cell types.

| Cell type   | Gene marker                     | Reference    |
|-------------|---------------------------------|--------------|
| T cell      | Cd3d, and Cd3g                  | (38)         |
| Cd4+ T cell | Cd4                             | (38)         |
| CD8+ T cell | Cd8                             | (38)         |
| uNK cell    | Klrb1c, Eomes, Itga1, and Itga2 | (56, 57, 58) |
| B cell      | Cd79a                           | (63)         |
| Macrophage  | Arg1, Mrc1, and Tlr1            | (53)         |
